# Supplementary material for: Thermal priming enhances heat tolerance in alfalfa (Medicago sativa L.) through activation of multiple metabolic pathways
Source: BMC Plant Biol. 2025 Dec 9;25:1689. doi: 10.1186/s12870-025-07726-w (PMC12690804; doi:10.1186/s12870-025-07726-w)
Supplement: Supplementary file 1 — Additional file 1. Table S1 Comprehensive evaluation results of heat tolerance of 12 alfalfa varieties. [file 12870_2025_7726_MOESM1_ESM.xlsx]

## Sheet: Sheet1
TableS1 Comprehensive evaluation results of heat tolerance of 12 alfalfa varieties
Variety	CHL	POD	SOD	CAT	MDA	EL	The membership function	Level
Sanditi	0.839	0.519	0.764	1	0.856	0.6	0.763	1
Queen	0.737	0.255	0.84	0.867	0.904	0.92	0.754	2
Eureka	0.451	0.511	0.828	0.828	1	0.75	0.728	3
Surprising	0.682	0.787	0.461	0.394	0.974	0.931	0.705	4
Sardi	0.9	1	0.342	0.009	0.654	0.918	0.637	5
Gongnong No.1	1	0.265	0.221	0.652	0.715	0.723	0.596	6
WL298HQ	0.872	0.58	0.336	0.282	0.344	1	0.569	7
Kehan	0.845	0.157	0.614	0.768	0.817	0.12	0.553	8
Algonguin	0.931	0.056	1	0.622	0.683	0	0.549	9
Zhongmu No.1	0.595	0.069	0.188	0.182	0.743	0.955	0.455	10
Guochanyiji	0.702	0	0.169	0	0.545	0.991	0.401	11
WL343HQ	0	0.22	0	0.414	0	0.829	0.244	12
