# Supplementary material for: Thermal priming enhances heat tolerance in alfalfa (Medicago sativa L.) through activation of multiple metabolic pathways
Source: BMC Plant Biol. 2025 Dec 9;25:1689. doi: 10.1186/s12870-025-07726-w (PMC12690804; doi:10.1186/s12870-025-07726-w)
Supplement: Supplementary file 2 — Additional file 2. Table S2 Transcriptome sequencing data. [file 12870_2025_7726_MOESM2_ESM.xlsx]

## Sheet: Sheet1
TableS2 Transcriptome sequencing data
sample	Row reads	Clean reads	Error rate（%）	Q20	Q30	GC（%）
CK-1	45759244	44347106	0.02	98.57	95.33	42.95
CK-2	48505382	47078906	0.02	98.5	95.1	42.79
CK-3	47283542	45690184	0.02	98.49	95.11	42.85
P1-1	44559396	43018286	0.02	98.59	95.41	42.55
P1-2	43857148	42485966	0.02	98.41	94.92	42.46
P1-3	46589458	45321210	0.02	98.58	95.36	42.53
P2-1	47756174	46409846	0.02	98.45	95.05	42.28
P2-2	43645458	42351690	0.02	98.38	94.84	42.23
P2-3	49276782	47638788	0.02	98.39	94.99	42.26
P3-1	46932554	45404438	0.02	98.54	95.25	42.23
P3-2	44220144	42858064	0.02	98.44	95.02	42.23
P3-3	46604898	44879686	0.02	98.59	95.44	42.11
UP-1	42426866	40906520	0.02	98.57	95.35	42.56
UP-2	43625622	42080090	0.02	98.38	94.85	42.42
UP-3	47778332	46176632	0.02	98.54	95.28	42.39
