# Supplementary material for: Thermal priming enhances heat tolerance in alfalfa (Medicago sativa L.) through activation of multiple metabolic pathways
Source: BMC Plant Biol. 2025 Dec 9;25:1689. doi: 10.1186/s12870-025-07726-w (PMC12690804; doi:10.1186/s12870-025-07726-w)
Supplement: Supplementary file 3 — Additional file 3. Table S3 Fatty acid content test results. [file 12870_2025_7726_MOESM3_ESM.xlsx]

## Sheet: Sheet1
TableS3. Fatty acid content test results
Abbreviation of fatty acid name	name	CK（μg/g）	P1（μg/g）	P2（μg/g）	P3（μg/g）	UP（μg/g）	P-value
C10-0	decylic acid	0.037±0.012	0.033±0.008	0.029±0.003	0.045±0.005	0.037±0.009	0.259
C18-2n6c	linoleic acid	32.297±1.112	35.99±0.123	37.409±2.585	32.12±3.237	34.346±6.152	0.299
C19-0	Octadecanoic acid	0.084±0.024	0.094±0.028	0.073±0.003	0.083±0.002	0.106±0.017	0.284
C22-1n9c	erucic acid	0.572±0.149cd	0.686±0.089bc	0.8±0.079ab	0.944±0.008a	0.455±0.027d	0.047
C12-0	lauric acid	0.242±0.026	0.288±0.074	0.207±0.025	0.334±0.095	0.249±0.033	0.16
C18-2n6t	trans-linoleic acid	6.914±0.229	7.804±0.439	8.778±1.195	7.246±1.111	8.395±0.935	0.121
C13-0	Tridecanoic acid	0.083±0.009	0.095±0.015	0.086±0.015	0.097±0.015	0.103±0.021	0.513
C18-3n3c	α-linolenic acid	301.544±2.329c	334.197±3.869c	424.315±44.262b	483.783±49.726a	317.118±1.437c	0.012
C14-0	myristic acid	0.919±0.045	1.081±0.385	0.785±0.124	1.369±0.54	1.286±0.33	0.254
C15-0	Pentadecanoic acid	0.691±0.043	0.78±0.261	0.505±0.112	0.978±0.303	1.092±0.423	0.132
C16-0	palmitic acid	39.232±2.108b	48.511±5.143b	61.9±9.833a	40.305±7.855b	41.33±8.879b	0.018
C17-0	pearlescent acid	0.355±0.021	0.345±0.065	0.332±0.039	0.432±0.083	0.457±0.07	0.094
C20-0	arachidic acid	0.602±0.014b	0.564±0.011b	0.602±0.07b	0.426±0.026c	0.811±0.101a	0.029
C22-0	behenic acid	0.42±0.04bc	0.46±0.116b	0.438±0.067b	0.304±0.053c	0.589±0.031a	0.007
C8-0	caprylic acid	0.084±0.001	0.077±0.003	0.082±0.012	0.113±0.054	0.09±0.01	0.482
C18-1n9c	oleic acid	9.071±0.76b	8.558±0.934b	8.606±1.387b	23.972±3.315a	9.696±3.315b	0.022
C18-0	stearic acid	9.37±1.669b	8.543±1.854b	16.741±4.897a	7.971±1.407b	8.358±2.176b	0.013
SFA	Saturated fatty acid	52.119±3.602b	60.87±7.756b	81.779±14.969a	52.455±10.318b	54.508±11.302b	0.026
MUFA	Monounsaturated fatty acids	9.644±0.628b	9.244±1.003b	9.406±1.372b	24.916±3.308a	10.151±0.405b	0.028
PUFA	Polyunsaturated fatty acid	340.755±3.291b	377.991±3.927b	470.502±45.017a	523.149±51.838a	359.86±8.428b	0.012
FFA	Total fatty acids	402.517±2.731b	448.105±9.578b	561.687±49.661a	600.52±61.698a	424.519±19.616b	0.011
