# Supplementary material for: Thermal priming enhances heat tolerance in alfalfa (Medicago sativa L.) through activation of multiple metabolic pathways
Source: BMC Plant Biol. 2025 Dec 9;25:1689. doi: 10.1186/s12870-025-07726-w (PMC12690804; doi:10.1186/s12870-025-07726-w)
Supplement: Supplementary file 4 — Additional file 4. Table S4 Name and source of alfalfa varieties. [file 12870_2025_7726_MOESM4_ESM.xlsx]

## Sheet: Sheet1
TableS4 Name and source of alfalfa varieties
number	Variety	Variety source
1	Gongnong No.1	JiuquanDaye seed industry co., ltd
2	Zhongmu No.1	Jiuquan Daye seed industry co., ltd
3	WL343HQ	Beijing zhengdao seed industry co., ltd
4	WL298HQ	Beijing zhengdao seed industry co., ltd
5	Guochanyiji	Beijing zhengdao seed industry co., ltd
6	Kehan	Beijing zhengdao seed industry co., ltd
7	Surprising	Beijing zhengdao seed industry co., ltd
8	Eureka	Beijing zhengdao seed industry co., ltd
9	Sanditi	Beijing zhengdao seed industry co., ltd
10	Queen	Beijing zhengdao seed industry co., ltd
11	Sardi	Beijing zhengdao seed industry co., ltd
12	Algonguin	Jiangsu Qian Hua Bai mei seed industry co., ltd
