# Supplementary material for: Thermal priming enhances heat tolerance in alfalfa (Medicago sativa L.) through activation of multiple metabolic pathways
Source: BMC Plant Biol. 2025 Dec 9;25:1689. doi: 10.1186/s12870-025-07726-w (PMC12690804; doi:10.1186/s12870-025-07726-w)
Supplement: Supplementary file 5 — Additional file 5. Table S5 Primer sequences. [file 12870_2025_7726_MOESM5_ESM.xlsx]

## Sheet: Sheet1
TableS5 Primer sequences
primer	Primer sequence	Product length/bp	Annealing temperature/℃
PAL-F	GAGCTGCAATGCTTGTGAGG	197	59
PAL-R	AGAGTTGGGTCTGCCCGTTA
4CL-F	CAACGAGGGAAACAATAGACAA	189	58
4CL-R	CGACAGCGACATCGGAAA
F5H-F	GAACGGAAACGGTAGCATCA	113	58
F5H-R	TCGGCTCAGACCCACAACT
CCR-F	GAGCCAGCGGAGCCATT	137	58
CCR-R	ACGACTCTTTGCTCCTTCCAT
HSFB2b-F	TCCGCCGCTTGATTTGAT	74	58
HSFB2b-R	ACGTCTGTAGAACCAGGTTGATGT
Peroxidase-F	AAACGGTTCCTATGAGAAGCAG	35	59
Peroxidase-R	GCGGCAAGAGCAAGTATGTC
β-Actin-F	GTTCCTATCTATGAAGGATATGCCC	147	58
β-Actin-R	GTCTCTCACGATTTCGCGCT
